# Supplementary material
Source: PubMed Central journal article supplement (PMC6647344)
Supplement: ao8b02477_si_001.pdf [file ao8b02477_si_001.pdf]

## **Supplementary Information File**

### **Co-benefits of wollastonite weathering in agriculture: CO<sub>2</sub> sequestration and promoted plant growth**

Fatima Haque<sup>1</sup>, Rafael M. Santos<sup>1</sup>, Animesh Dutta<sup>1</sup>, Mahendra Thimmanagari<sup>2</sup>, Yi Wai Chiang<sup>1</sup> \*

<sup>1</sup>University of Guelph, School of Engineering, 50 Stone Road East, N1G 2W1, Guelph, Ontario, Canada

<sup>2</sup>Ontario Ministry of Agriculture, Food and Rural Affairs, 1 Stone Road West, N1G 4Y1, Guelph, Ontario, Canada

\*Corresponding author; Email: [chiange@uoguelph.ca](mailto:chiange@uoguelph.ca); Tel.: +1-519-824-4120 ext: 58217

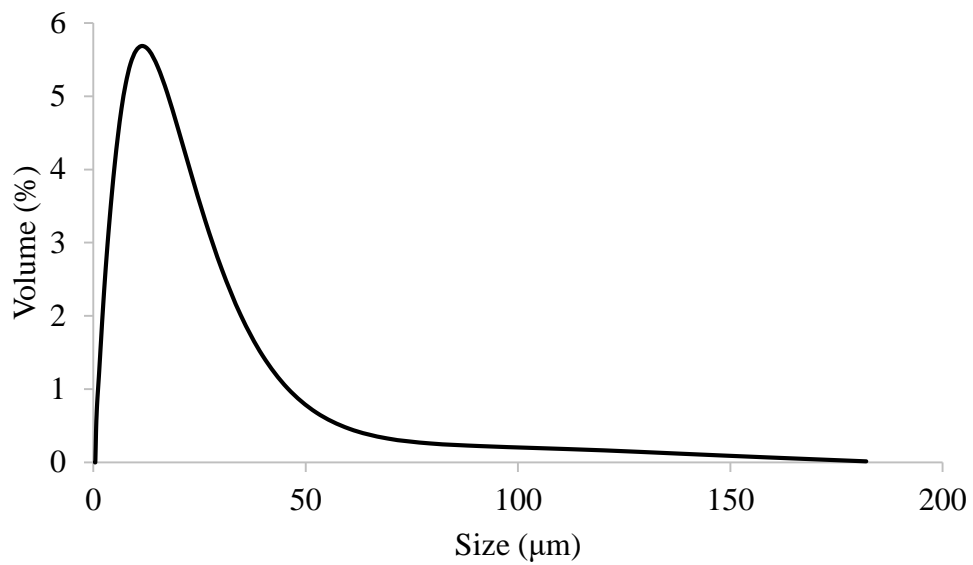

**Figure S1:** Particle size distribution of Canadian wollastonite, determined by wet laser diffraction.

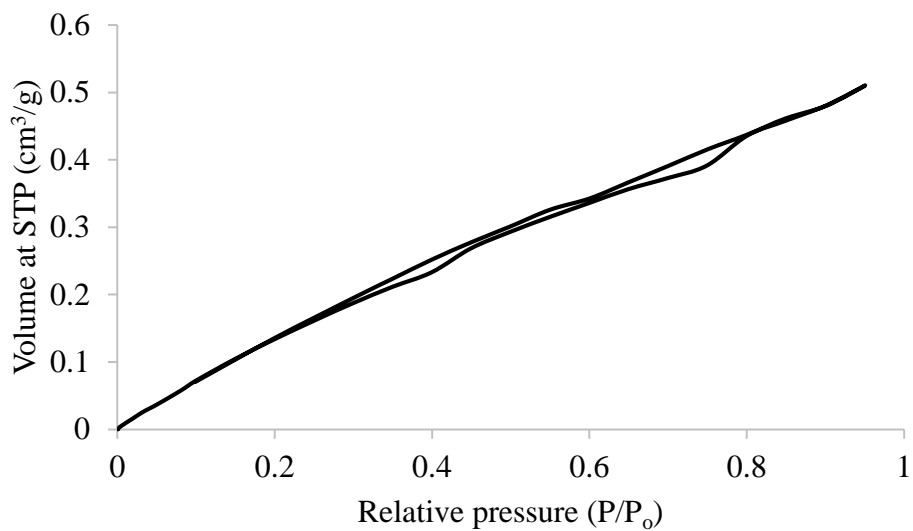

**Figure S2:** Nitrogen adsorption/desorption isotherm of Canadian wollastonite, determined for specific surface area and pore size analyses.

### ***Wollastonite-to-soil ratio selection***

Figure S3 shows the variation of pH versus time for various wollastonite-amended soils. Change in pH was monitored over a period of 72 h. The initial pH of the soil (as-received) was  $4.81 \pm 0.01$ . For 0.5 h shaking time, 10 g and 20 g wollastonite addition (to 8 kg soil) showed the same pH increase to 4.94, and final pH (72 h shaking) of  $5.41 \pm 0.01$  and  $5.53 \pm 0.02$ , respectively. Addition of higher amounts, 200 g, and 600 g, resulted in a final pH of  $6.67 \pm 0.01$  and  $7.17 \pm 0.01$ . Geochemical modelling, using Visual Minteq v3.1, showed that at pH  $7.23 \pm 0.02$  the saturation index becomes positive, which is required for the precipitation of solid mineral phases, especially calcite in the case of wollastonite.

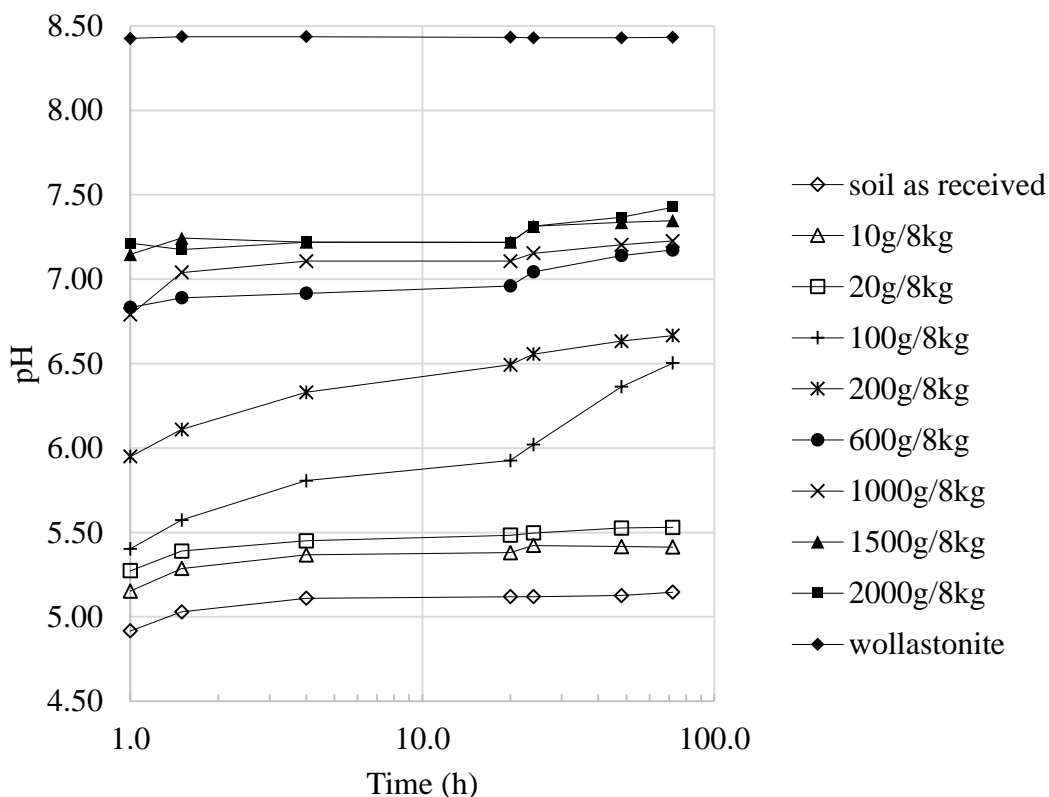

**Figure S3:** Variation of pH with time of various wollastonite-amended soils, including as-received soil and as-received wollastonite.

**Table S1:** Development stages of beans and corn plants in wollastonite-amended and non-amended soils, in cumulative days from start of growth period.

|                                      | <b>V1</b> | <b>V2</b> | <b>V3</b> | <b>V4</b> | <b>R1</b>  | <b>R2</b> | <b>R3</b> | <b>R4</b> |
|--------------------------------------|-----------|-----------|-----------|-----------|------------|-----------|-----------|-----------|
| “Soil+Bean” and “MSA+Bean”<br>(days) | 15        | 21        | 26        | 32        | 36         | 40        | 45        | 49        |
|                                      | <b>V1</b> | <b>V2</b> | <b>V4</b> | <b>V6</b> | <b>V10</b> | <b>VT</b> |           |           |
| “Soil+Corn” and “MSA+Corn”<br>(days) | 17        | 26        | 20        | 25        | 33         | 52        |           |           |

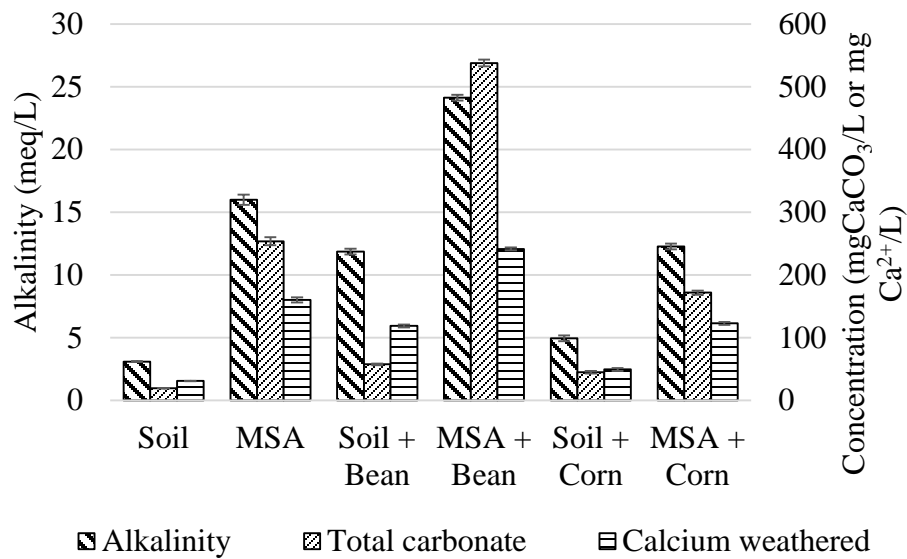

**Figure S4:** Alkalinity and total carbonate of all potting experiments at the end of the growth period (55 days).

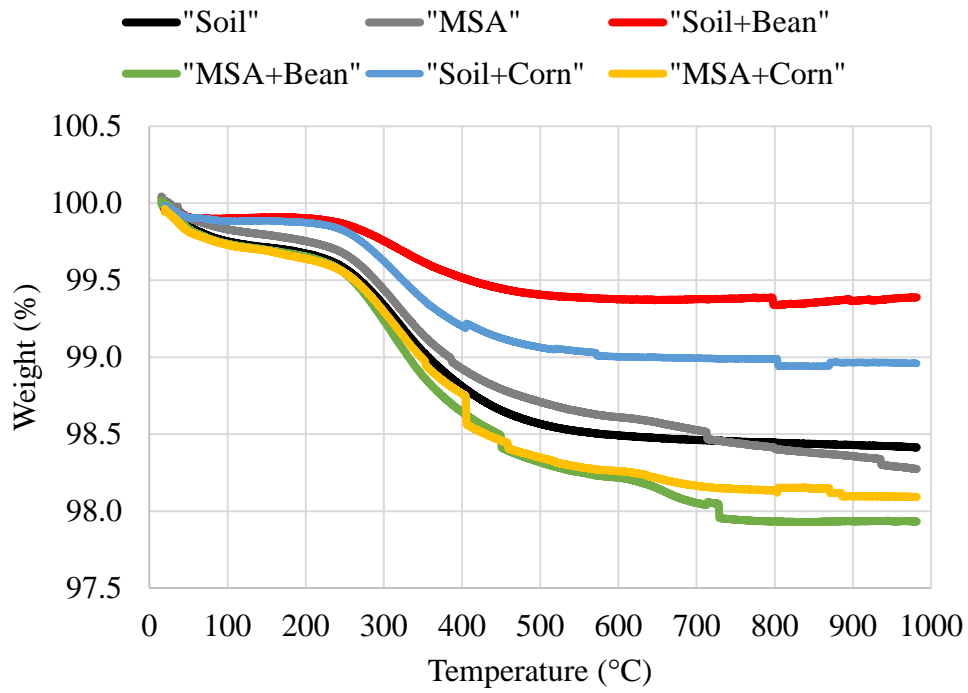

**Figure S5:** Thermogravimetric analysis of all potting samples at the end of the growth period (55 days).

*Geochemical Modelling using The Geochemist's Workbench*

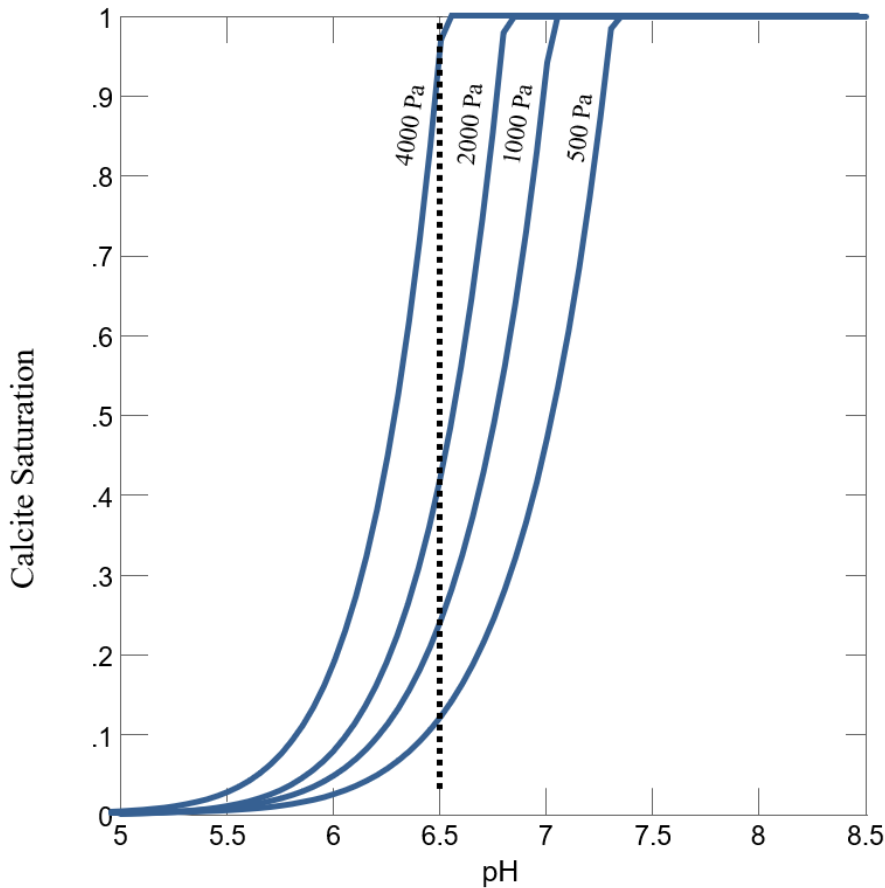

**Figure S6:** Calcite saturation versus pH at different CO<sub>2</sub> partial pressures (pCO<sub>2</sub>, 500-4000 Pa), generated using The Geochemist's Workbench.

The soil pCO<sub>2</sub> is higher than the atmospheric pCO<sub>2</sub> because of the soil root respiration and plant matter decay.<sup>1</sup> For a pCO<sub>2</sub> range of 500 Pa to 4000 Pa, Figure S6 shows that calcite precipitation is favored at a pH above 6.5.

---

<sup>1</sup> Railsback BL. *Some Fundamentals of Mineralogy and Geochemistry*; Department of Geology, University of Georgia: Athens, Georgia, U.S.A, 2006. Weblink: <http://www.gly.uga.edu/railsback/FundamentalsIndex.html> (accessed 2018/10/19)



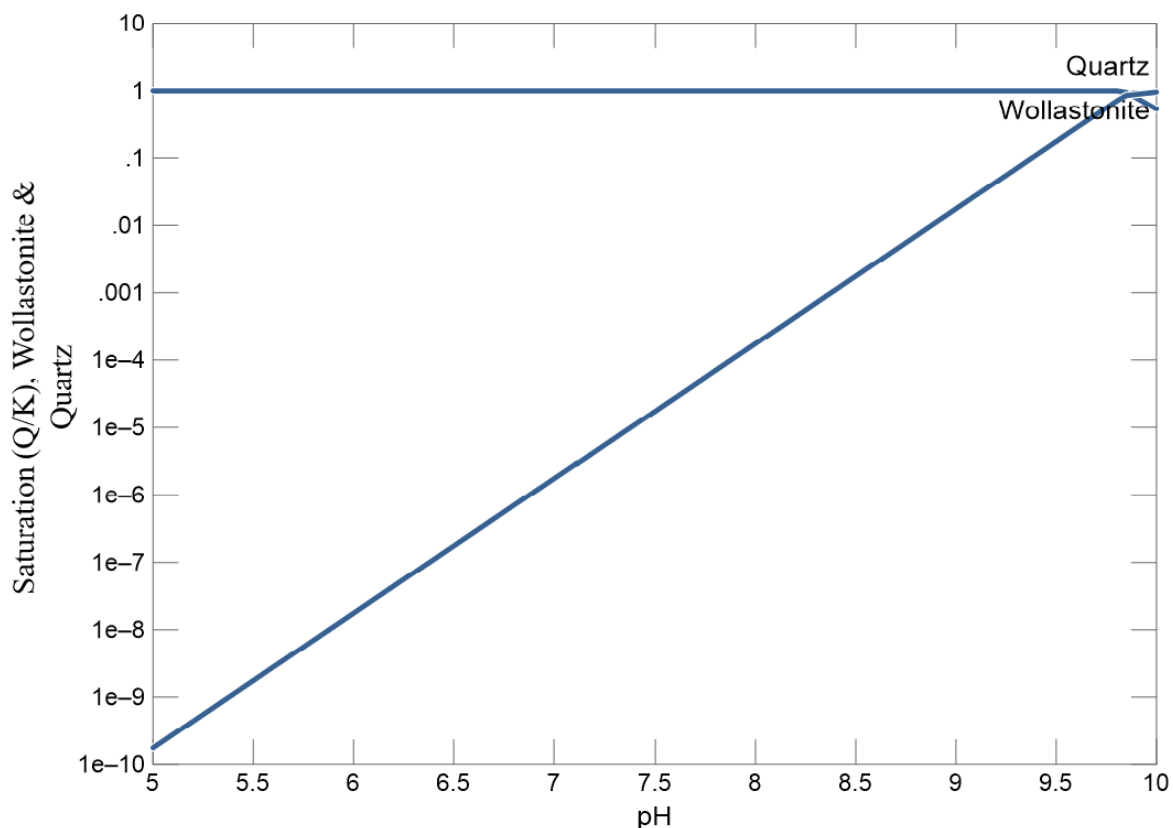

**Figure S7:** Wollastonite and quartz saturation as a function of pH, generated using The Geochemist’s Workbench.

The saturation ( $Q/K$ ,  $Q$  is the reaction quotient, and  $K$  is the equilibrium constant) of wollastonite is less than 1 and it decreases further with decreasing pH. This implies that solubility product ( $K$ ) is higher at lower pH, hence wollastonite is more prone to dissolution as pH lowers. In the pH range of 5-10 (Figure S7), wollastonite is soluble (i.e.  $Q/K < 1$ ).
